# Supplementary material for: Association between Helicobacter pylori infection and the risk of colorectal cancer: A systematic review and meta-analysis
Source: PubMed Central journal article supplement (PMC7489651; doi:10.1097/md.0000000000021832), 2020-09-11

| Study or Subgroup                                                                                                   | Experimental |        | Control      |               | Weight (fixed) | Weight (random) | Odds Ratio                 |                            | Odds Ratio |  |
|---------------------------------------------------------------------------------------------------------------------|--------------|--------|--------------|---------------|----------------|-----------------|----------------------------|----------------------------|------------|--|
|                                                                                                                     | Total        | Events | Total        | Events        |                |                 | MH, Fixed + Random, 95% CI | MH, Fixed + Random, 95% CI |            |  |
| region = Europe                                                                                                     |              |        |              |               |                |                 |                            |                            |            |  |
| SiddheshwarRK, 2001                                                                                                 | 10           | 59     | 1            | 58            | 0.0%           | 0.8%            | 11.63                      | [1.44, 94.12]              |            |  |
| Breuer-KatschinskiB, 1999                                                                                           | 789          | 1712   | 669          | 1669          | 7.9%           | 2.4%            | 1.28                       | [1.11, 1.46]               |            |  |
| SeigradM, 2014                                                                                                      | 117          | 142    | 67           | 119           | 0.3%           | 2.1%            | 3.63                       | [2.07, 6.38]               |            |  |
| Zhang Y, 2012                                                                                                       | 76           | 98     | 61           | 98            | 0.3%           | 2.0%            | 2.10                       | [1.12, 3.92]               |            |  |
| StrofiiasA, 2012                                                                                                    | 23           | 78     | 9            | 78            | 0.1%           | 1.8%            | 3.21                       | [1.37, 7.49]               |            |  |
| GeorgopoulosSD, 2006                                                                                                | 66           | 93     | 13           | 20            | 0.1%           | 1.7%            | 1.32                       | [0.47, 3.66]               |            |  |
| MaucciG, 1997                                                                                                       | 69           | 138    | 64           | 239           | 0.5%           | 2.2%            | 2.73                       | [1.76, 4.24]               |            |  |
| PenmanID, 1994                                                                                                      | 25           | 42     | 18           | 34            | 0.2%           | 1.8%            | 1.31                       | [0.52, 3.26]               |            |  |
| JonesM, 2007                                                                                                        | 110          | 189    | 110          | 187           | 1.0%           | 2.2%            | 0.97                       | [0.65, 1.47]               |            |  |
| Total (fixed effect, 95% CI)                                                                                        |              | 2551   |              | 2502          | 10.4%          | --              | 1.45                       | [1.29, 1.63]               |            |  |
| Total (random effects, 95% CI)                                                                                      |              |        |              |               | --             | 17.0%           | 1.93                       | [1.33, 2.79]               |            |  |
| Heterogeneity: Tau <sup>2</sup> = 0.19, Chi <sup>2</sup> = 33.67, df = 8 (P < 0.01), I <sup>2</sup> = 76%           |              |        |              |               |                |                 |                            |                            |            |  |
| Test for overall effect (fixed effect): Z = 6.33 (P < 0.01)                                                         |              |        |              |               |                |                 |                            |                            |            |  |
| Test for overall effect (random effects): Z = 3.48 (P < 0.01)                                                       |              |        |              |               |                |                 |                            |                            |            |  |
| region = America                                                                                                    |              |        |              |               |                |                 |                            |                            |            |  |
| JuliaButt, 2018                                                                                                     | 2629         | 4063   | 2713         | 4063          | 20.6%          | 2.4%            | 0.91                       | [0.83, 1.00]               |            |  |
| Jennifer, 2016                                                                                                      | 154          | 392    | 275          | 774           | 2.4%           | 2.3%            | 1.17                       | [0.91, 1.51]               |            |  |
| AbbassK, 2011                                                                                                       | 36           | 96     | 27           | 96            | 0.4%           | 2.1%            | 1.53                       | [0.84, 2.81]               |            |  |
| Total (fixed effect, 95% CI)                                                                                        |              | 4551   |              | 4933          | 23.4%          | --              | 0.95                       | [0.87, 1.03]               |            |  |
| Total (random effects, 95% CI)                                                                                      |              |        |              |               | --             | 6.7%            | 1.07                       | [0.83, 1.38]               |            |  |
| Heterogeneity: Tau <sup>2</sup> = 0.03, Chi <sup>2</sup> = 5.88, df = 2 (P = 0.05), I <sup>2</sup> = 68%            |              |        |              |               |                |                 |                            |                            |            |  |
| Test for overall effect (fixed effect): Z = 1.20 (P = 0.23)                                                         |              |        |              |               |                |                 |                            |                            |            |  |
| Test for overall effect (random effects): Z = 0.52 (P = 0.60)                                                       |              |        |              |               |                |                 |                            |                            |            |  |
| region = America                                                                                                    |              |        |              |               |                |                 |                            |                            |            |  |
| BlaseJL, 2016                                                                                                       | 213          | 392    | 121          | 774           | 0.8%           | 2.3%            | 6.42                       | [4.86, 8.48]               |            |  |
| BusoAG, 2009                                                                                                        | 66           | 94     | 51           | 94            | 0.3%           | 2.1%            | 1.99                       | [1.09, 3.62]               |            |  |
| LimburgPJ, 2002                                                                                                     | 86           | 118    | 172          | 236           | 0.7%           | 2.2%            | 1.00                       | [0.61, 1.64]               |            |  |
| ThorburnCM, 1998                                                                                                    | 159          | 233    | 158          | 233           | 1.1%           | 2.2%            | 1.02                       | [0.69, 1.51]               |            |  |
| TalleyNJ, 1991                                                                                                      | 41           | 80     | 96           | 252           | 0.5%           | 2.1%            | 1.71                       | [1.03, 2.84]               |            |  |
| MassSF, 1995                                                                                                        | 23           | 41     | 26           | 41            | 0.2%           | 1.8%            | 0.74                       | [0.30, 1.79]               |            |  |
| Total (fixed effect, 95% CI)                                                                                        |              | 958    |              | 1630          | 3.6%           | --              | 2.37                       | [2.00, 2.82]               |            |  |
| Total (random effects, 95% CI)                                                                                      |              |        |              |               | --             | 12.7%           | 1.63                       | [0.74, 3.62]               |            |  |
| Heterogeneity: Tau <sup>2</sup> = 0.91, Chi <sup>2</sup> = 87.68, df = 5 (P < 0.01), I <sup>2</sup> = 94%           |              |        |              |               |                |                 |                            |                            |            |  |
| Test for overall effect (fixed effect): Z = 9.83 (P < 0.01)                                                         |              |        |              |               |                |                 |                            |                            |            |  |
| Test for overall effect (random effects): Z = 1.21 (P = 0.23)                                                       |              |        |              |               |                |                 |                            |                            |            |  |
| region = Asian                                                                                                      |              |        |              |               |                |                 |                            |                            |            |  |
| ShmuelYH, 2001                                                                                                      | 50           | 67     | 63           | 92            | 0.3%           | 2.0%            | 1.35                       | [0.67, 2.74]               |            |  |
| FujimoriS, 2005                                                                                                     | 391          | 481    | 527          | 669           | 1.8%           | 2.3%            | 1.17                       | [0.87, 1.57]               |            |  |
| Dongai, 2019                                                                                                        | 1097         | 3483   | 568          | 1925          | 10.8%          | 2.4%            | 1.10                       | [0.97, 1.24]               |            |  |
| YeYan, 2017                                                                                                         | 845          | 1641   | 297          | 1641          | 3.1%           | 2.4%            | 4.80                       | [4.10, 5.63]               |            |  |
| ChangxiChen, 2019                                                                                                   | 104          | 180    | 479          | 1195          | 1.1%           | 2.3%            | 2.05                       | [1.49, 2.81]               |            |  |
| SongYF, 2007                                                                                                        | 102          | 172    | 223          | 342           | 1.3%           | 2.2%            | 0.78                       | [0.53, 1.13]               |            |  |
| WuJ, 2009                                                                                                           | 135          | 240    | 164          | 305           | 1.4%           | 2.3%            | 1.11                       | [0.79, 1.55]               |            |  |
| LiuJM, 2006                                                                                                         | 67           | 110    | 275          | 462           | 0.9%           | 2.2%            | 1.06                       | [0.69, 1.62]               |            |  |
| DongKIROU, 2019                                                                                                     | 49           | 135    | 568          | 1925          | 1.0%           | 2.3%            | 1.36                       | [0.95, 1.96]               |            |  |
| YufangS, 2007                                                                                                       | 102          | 172    | 121          | 172           | 1.1%           | 2.2%            | 0.61                       | [0.39, 0.96]               |            |  |
| LinYL, 2010                                                                                                         | 1113         | 1927   | 815          | 7384          | 3.1%           | 2.4%            | 11.02                      | [9.81, 12.38]              |            |  |
| Kuang-ChunHu, 2017                                                                                                  | 112          | 224    | 414          | 1325          | 1.3%           | 2.3%            | 2.20                       | [1.65, 2.93]               |            |  |
| DayamaA, 2011                                                                                                       | 790          | 1712   | 582          | 1669          | 6.8%           | 2.4%            | 1.60                       | [1.39, 1.84]               |            |  |
| FatemehTeimoorianxirou, 2018                                                                                        | 12           | 17     | 32           | 100           | 0.1%           | 1.6%            | 5.10                       | [1.66, 15.70]              |            |  |
| FatemehTeimoorianai, 2018                                                                                           | 14           | 33     | 32           | 100           | 0.2%           | 1.9%            | 1.57                       | [0.70, 3.51]               |            |  |
| Fireman, 2000                                                                                                       | 41           | 51     | 32           | 51            | 0.1%           | 1.8%            | 2.43                       | [1.00, 5.95]               |            |  |
| MizunoS, 2005                                                                                                       | 133          | 176    | 196          | 303           | 0.8%           | 2.2%            | 1.69                       | [1.11, 2.56]               |            |  |
| Machida-MontaniA, 2007                                                                                              | 82           | 113    | 244          | 339           | 0.7%           | 2.2%            | 1.03                       | [0.64, 1.66]               |            |  |
| Inoue, 2011                                                                                                         | 201          | 239    | 368          | 478           | 0.8%           | 2.2%            | 1.58                       | [1.05, 2.38]               |            |  |
| Nam JH, 2017                                                                                                        | 685          | 1245   | 1561         | 3221          | 8.4%           | 2.4%            | 1.30                       | [1.14, 1.48]               |            |  |
| Nam JH, 2017                                                                                                        | 610          | 1127   | 1561         | 3221          | 8.0%           | 2.4%            | 1.25                       | [1.10, 1.44]               |            |  |
| Nam JH, 2017                                                                                                        | 75           | 118    | 1561         | 3221          | 0.9%           | 2.2%            | 1.85                       | [1.27, 2.72]               |            |  |
| KimTJ, 2017                                                                                                         | 162          | 5399   | 62           | 3517          | 1.6%           | 2.3%            | 1.72                       | [1.28, 2.32]               |            |  |
| NamKW, 2013                                                                                                         | 101          | 151    | 335          | 597           | 1.0%           | 2.2%            | 1.58                       | [1.09, 2.30]               |            |  |
| BaeRC, 2009                                                                                                         | 73           | 133    | 131          | 213           | 1.0%           | 2.2%            | 0.76                       | [0.49, 1.18]               |            |  |
| TaweesakT, 2018                                                                                                     | 109          | 180    | 34           | 151           | 0.3%           | 2.2%            | 5.28                       | [3.25, 8.58]               |            |  |
| EnginAB, 2010                                                                                                       | 77           | 110    | 71           | 116           | 0.4%           | 2.1%            | 1.48                       | [0.85, 2.57]               |            |  |
| BanuBoyuk, 2019                                                                                                     | 112          | 143    | 146          | 171           | 0.6%           | 2.1%            | 0.62                       | [0.35, 1.11]               |            |  |
| HongSN, 2012                                                                                                        | 317          | 506    | 1253         | 2195          | 3.8%           | 2.3%            | 1.26                       | [1.03, 1.54]               |            |  |
| Total (fixed effect, 95% CI)                                                                                        |              | 20285  |              | 37100         | 62.6%          | --              | 1.98                       | [1.90, 2.07]               |            |  |
| Total (random effects, 95% CI)                                                                                      |              |        |              |               | --             | 63.6%           | 1.60                       | [1.16, 2.21]               |            |  |
| Heterogeneity: Tau <sup>2</sup> = 0.73, Chi <sup>2</sup> = 1314.93, df = 28 (P < 0.01), I <sup>2</sup> = 98%        |              |        |              |               |                |                 |                            |                            |            |  |
| Test for overall effect (fixed effect): Z = 30.77 (P < 0.01)                                                        |              |        |              |               |                |                 |                            |                            |            |  |
| Test for overall effect (random effects): Z = 2.86 (P < 0.01)                                                       |              |        |              |               |                |                 |                            |                            |            |  |
| <b>Total (fixed effect, 95% CI)</b>                                                                                 | <b>28345</b> |        | <b>46165</b> | <b>100.0%</b> | <b>100.0%</b>  | --              | <b>1.70</b>                | <b>[1.64, 1.76]</b>        |            |  |
| <b>Total (random effects, 95% CI)</b>                                                                               |              |        |              |               |                | <b>100.0%</b>   | <b>1.64</b>                | <b>[1.29, 2.08]</b>        |            |  |
| Heterogeneity: Tau <sup>2</sup> = 0.62, Chi <sup>2</sup> = 1700.11, df = 46 (P < 0.01), I <sup>2</sup> = 97%        |              |        |              |               |                |                 |                            |                            |            |  |
| Residual heterogeneity: Tau <sup>2</sup> = NA, Chi <sup>2</sup> = 1442.17, df = 43 (P < 0.01), I <sup>2</sup> = 97% |              |        |              |               |                |                 |                            |                            |            |  |
| Test for overall effect (fixed effect): Z = 29.09 (P < 0.01)                                                        |              |        |              |               |                |                 |                            |                            |            |  |
| Test for overall effect (random effects): Z = 4.05 (P < 0.01)                                                       |              |        |              |               |                |                 |                            |                            |            |  |
| Test for subgroup differences (fixed effect): Chi <sup>2</sup> = 248.97, df = 3 (P < 0.01)                          |              |        |              |               |                |                 |                            |                            |            |  |
| Test for subgroup differences (random effects): Chi <sup>2</sup> = 7.69, df = 3 (P = 0.05)                          |              |        |              |               |                |                 |                            |                            |            |  |

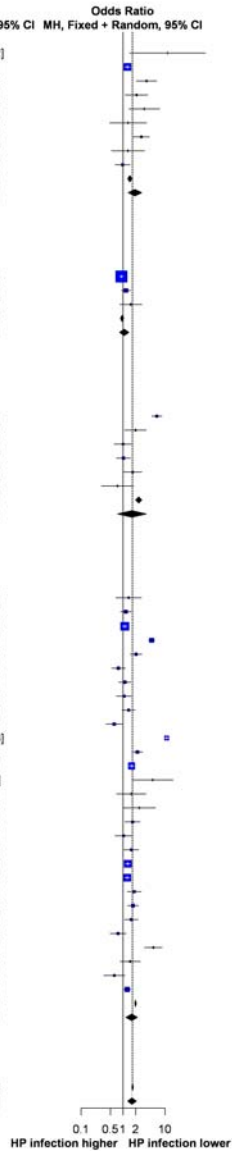

Supplement: medi-99-e21832-s001.pdf [file medi-99-e21832-s001.pdf]
